# Supplementary material for: Monodisperse TiO2 hierarchical hollow spheres assembled by nanospindles for dye-sensitized solar cells
Source: Royal Society of Chemistry journal article supplement (doi:10.1039/c2jm30786c), 2012-01-01
Supplement: c2jm30786c.pdf [file c2jm30786c.pdf]

## Electronic Supplementary Information (ESI)

### Monodisperse TiO<sub>2</sub> Hierarchical Hollow Spheres Assembled from Nanospindles for Dye-sensitized Solar Cells

Dapeng wu<sup>ab</sup>, Feng Zhu<sup>a</sup>, Jianming Li<sup>a</sup>, Hui Dong<sup>a</sup>, Qi Li<sup>a</sup>, Kai Jiang<sup>b\*</sup>, Dongsheng

Xu<sup>a\*</sup>

<sup>a</sup> Beijing National Laboratory for Molecular Sciences, State Key Laboratory for Structural Chemistry of Unstable and Stable Species, College of Chemistry and Molecular Engineering, Peking University, Beijing 100871, P.R. China

<sup>b</sup> College of Chemistry and Environmental Science, Henan Normal University  
Henan Xinxiang 453007, P.R. China,

\* To whom correspondence should be addressed: Prof. Dongsheng Xu  
E-mail: [dsxu@pku.edu.cn](mailto:dsxu@pku.edu.cn), Tel: 86-10-62753580, Fax: 86-10-62760360. Prof. Kai  
Jiang E-mail: [jiangkai6898@126.com](mailto:jiangkai6898@126.com), Tel./Fax: 86-373-3326209.

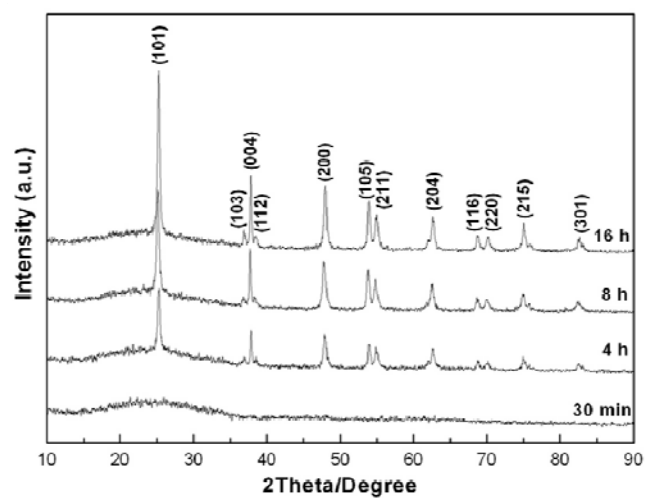

**Fig. S1.** XRD curves of the intermediate samples collected at different time intervals.

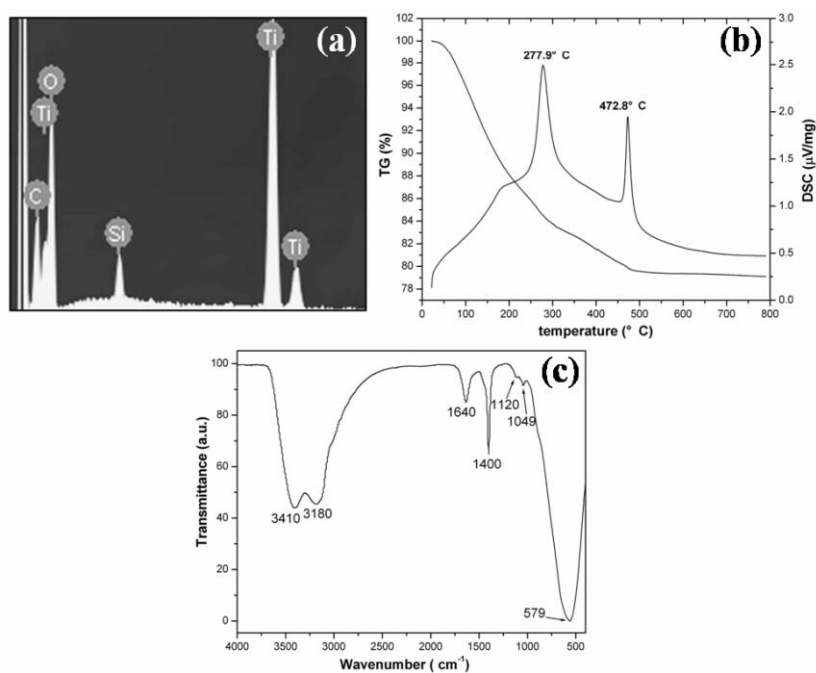

**Fig. S2.** (a) EDS, (b) TG-DSC and (c) FTIR analysis of the sample collected at  
30 min.

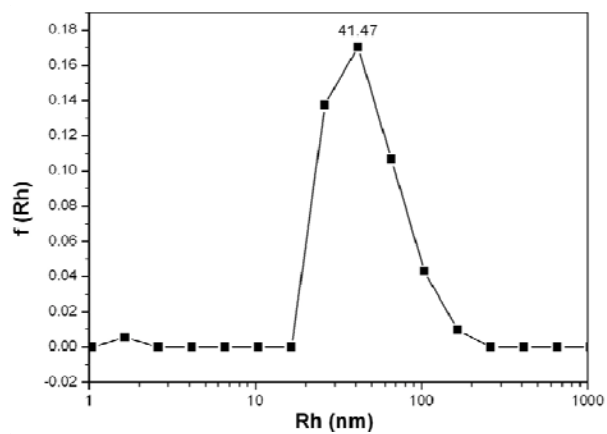

**Fig. S3** The dynamic laser scattering (DLS) plot of the precursor solution before hydrothermal reaction

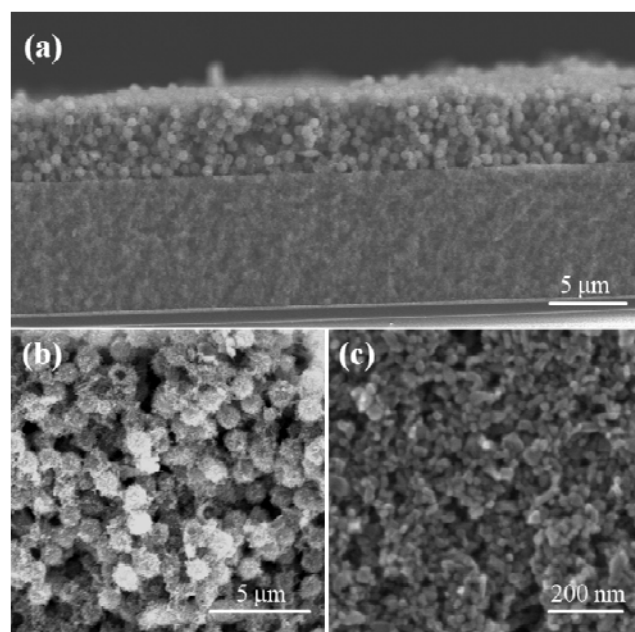

**Fig. S4.** SEM images of the as-prepared Film-4: (a) cross-section view, (b) surface of the scattering layer and (c) the absorption layer consisted of nano-sized particles.
